# Supplementary material for: Betapapillomaviruses in p16-Negative Vulvar Intraepithelial Lesions Associated with Squamous Cell Carcinoma
Source: Viruses. 2023 Sep 19;15(9):1950. doi: 10.3390/v15091950 (PMC10537070; doi:10.3390/v15091950)
Supplement: Supplementary file 1 [file viruses-15-01950-s001.zip › Supplemental_Data S3.xlsx]

## Sheet: HPV 5
SDS 2.4	AQ Results
Filename	2022-11-14
PlateID
Assay Type	Absolute Quantification
Run DateTime	2022-11-14 20:01:09
Operator
ThermalCycleParams
c	log10	Copy nr	Mean Ct		Linear regression
beta globin	3.47712	3000	25.8007		Y = -3.115*X + 36.56	k	-3.157
	2.47712	300	28.8266			n	36.74
	1.47712	30	32.1155			R squared	99.9
HPV5	6	1000000	22.4769
	5	100000	27.2414		Y = -2.573*X + 38.93	k	-2.573
	4	10000	30.9239			n	38.93
	3	1000	27.5265			R squared	84
	2	100	34.6109
	1	10	36.7464
No template control HPV5		37.544
No template control beta globin		undetermined
Sample ID	probe type	CT average	K value	N value	calculate x	10ˆx	Cell equivalent	Copy number per cell
15Pb	Beta globin	26.2372	-3.157	36.74	3.32682	2122.34	1061.17	0.0460084
	HPV5	34.5852	-2.573	38.93	1.68862	48.8227
15Ca	Beta globin	30.8499	-3.157	36.74	1.86573	73.4062	36.7031
	HPV5	UNDETERMINED	-2.573	38.93	#VALUE!	#VALUE!
5Pb	Beta globin	26.5396	-3.157	36.74	3.23104	1702.3	851.149	1.63649
	HPV5	30.8407	-2.573	38.93	3.14392	1392.9
5Cb	Beta globin	26.7115	-3.157	36.74	3.17659	1501.72	750.858	0.253726
	HPV5	33.0638	-2.573	38.93	2.27992	190.512

## Sheet: HPV 9
SDS 2.4	AQ Results
Filename	2022-11-15
PlateID
Assay Type	Absolute Quantification
Run DateTime	2022-11-15 12:06:07
Operator
ThermalCycleParams
0	log10	Copy nr	Mean Ct		Linear regression
beta globin	3.47712	3000	25.757		Y = -3.115*X + 36.56	k	-3.115
	2.47712	300	28.7846			n	36.56
	1.47712	30	31.9873			R squared	99.9
HPV9	6	1000000	19.523
	5	100000	22.8558		Y = -3.152*X + 38.53	k	-3.152
	4	10000	25.7868			n	38.53
	3	1000	29.3079			R squared	99.9
	2	100	32.3219
	1	10	35.2031
No template control HPV9		Undetermined
No template control beta globin		37.204
Sample ID	probe type	CT average	K value	N value	calculate x	10ˆx	Cell equivalent	Copy number per cell
50PCa	Beta globin	27.9046	-3.115	36.56	2.77862	600.651	300.325	0.940703
	HPV9	30.8043	-3.152	38.53	2.45104	282.517
45P	Beta globin	Undetermined
	HPV111	Undetermined

## Sheet: HPV 24
SDS 2.4	AQ Results
Filename	2022-11-17
PlateID
Assay Type	Absolute Quantification
Run DateTime	2022-11-17 11:47:53
Operator
ThermalCycleParams
0	log10	Copy nr	Mean Ct		Linear regression
beta globin	3.47712	3000	26.1137		Y = -3.115*X + 36.56	k	-3.115
	2.47712	300	29.277			n	36.56
	1.47712	30	32.306			R squared	99.9
HPV24	6	1000000	21.2839
	5	100000	25.4907		Y = -3.025*X + 40.52	k	-3.025
	4	10000	29.2651			n	40.52
	3	1000	32.5603			R squared	97.01
	2	100	34.8139
	1	10	36.2036
No template control HPV24		37.2927
No template control beta globin		Undetermined
Sample ID	probe type	CT average	K value	N value	calculate x (x=(y-n)/k	10ˆx	Cell equivalent	Copy number per cell
23Pb	Beta globin	26.3711	-3.115	36.56	3.27092	1866.05	933.025	0.232826
	HPV111	33.4508	-3.025	40.52	2.33692	217.232
23Cb	Beta globin	25.8097	-3.115	36.56	3.45113	2825.7	1412.85	0.162068
	HPV111	33.3816	-3.025	40.52	2.35979	228.978

## Sheet: HPV 111
SDS 2.4	AQ Results	1
Filename	11-15-22-HPV111
PlateID
Assay Type	Absolute Quantification
Run DateTime	2022-11-15 17:13:53
Operator
ThermalCycleParams
c	log10	Copy nr	Mean Ct		Linear regression
beta globin	3.47712	3000	28.5927		Y = -3.212*X + 39.78	k	-3.212
	2.47712	300	31.8609			n	39.78
	1.47712	30	35.016			R squared	99.9
HPV111	6	1000000	23.495
	5	100000	28.3336		Y = -2.022*X + 37.55	k	-2.022
	4	10000	30.3856			n	37.55
	3	1000	33.2632			R squared	87.2
	2	100	33.6775
	1	10	33.9074
No template control HPV111		33.4437
No template control beta globin		undetermined
Sample ID	probe type	CT average	K value	N value	calculate x	10ˆx	Cell equivalent	Copy number per cell
35Pb	Beta globin	30.2595	-3.212	39.78	2.96405	920.56	460.28	153.595
	HPV111	27.7445	-2.022	37.55	4.8494	70696.8
35Ca	Beta globin	30.7296	-3.212	39.78	2.81767	657.159	328.579	105.621
	HPV111	28.3693	-2.022	37.55	4.54039	34704.8

## Sheet: Human Control DNA_HPV probes
	HPV5	6	1000000	22.4981							HPV9	6	1000000	20.5864								HPV24	6	1000000	19.1112								HPV111	6	1000000	20.7682
		5	100000	25.7736								5	100000	23.5903									5	100000	23.3406									5	100000	23.9534
		4	10000	30.7024								4	10000										4	10000	27.5385									4	10000	26.6445
		3	1000	35.0494								3	1000	26.7048									3	1000	30.9577									3	1000	28.6212
		2	100	36.4772								2	100	29.4868									2	100	33.7141									2	100	29.244
		1	10	37.3774								1	10	30.2366									1	10	35.449									1	10	29.3564
			Y = -3.167*X + 42.40										Y = -1.934*X + 32.70											Y = -3.321*X + 39.97										Y = -1.737*X + 32.51
		beta globin	HPV5									beta globin	HPV9										beta globin	HPV24										beta globin	HPV111
	k	-2.943	-3.167								k	-2.943	-1.934									k	-2.943	-3.321									k	-2.943	-1.737
	n	35.53	42.4								n	35.53	32.7									n	35.53	39.97									n	35.53	32.51
	R squared	99.9	94.3								R squared	99.9	97.9									R squared	99.9	97.9									R squared	99.9	88.7
	Sample ID	probe type	CT average	K value	N value	calculate x	10ˆx	Cell equivalent	Copy number per cell		Sample ID	probe type	CT average	K value	N value	calculate x	10ˆx	Cell equivalent	Copy number per cell			Sample ID	probe type	CT average	K value	N value	calculate x	10ˆx	Cell equivalent	Copy number per cell			Sample ID	probe type	CT average	K value	N value	calculate x	10ˆx	Cell equivalent	Copy number per cell
	Human control for hPV111	Beta globin	25.46	-2.943	35.53	3.42169	2640.5	1320.25	0.0688573		Human control for hPV111	Beta globin	25.46	-2.943	35.53	3.42169	2640.5	1320.25	2.70104e-05			Human control for hPV111	Beta globin	25.46	-2.943	35.53	3.42169	2640.5	1320.25	0.0241955			Human control for hPV111	Beta globin	25.46	-2.943	35.53	3.42169	2640.5	1320.25	0.0323071
		HPV5	36.1971	-3.167	42.4	1.95861	90.9089					HPV9	35.5001	-1.934	32.7	-1.44781	0.0356605						HPV24	34.9739	-3.321	39.97	1.50439	31.9442						HPV111	29.6788	-1.737	32.51	1.62995	42.6534
	0	log10	Copy nr	Mean Ct
	beta globin	3.47712	3000	25.46
		2.47712	300	27.9273
		1.47712	30	31.345		Y = -2.943*X + 35.53
